# Supplementary material for: Phylogenomic approaches to common problems encountered in the analysis of low copy repeats: The sulfotransferase 1A gene family example
Source: PubMed Central journal article supplement (PMC555591; doi:10.1186/1471-2148-5-22), 2005-03-07
Supplement: 1471-2148-5-22-S2.pdf [file 1471-2148-5-22-S2.pdf]

**Supplementary Table 1****Pairwise *n* and *c* Values for SULT 1A Genes**

|                | Human<br>1A4 | Human<br>1A3 | Chimp<br>1A3 | Gorilla<br>1A3 | Human<br>1A2 | Chimp<br>1A2 | Gorilla<br>1A2 | Human<br>1A1 | Chimp<br>1A2 | Gorilla<br>1A1 | Macaca | Rabbit | Dog | Mouse | Rat | Pig | Cow | Platypus |
|----------------|--------------|--------------|--------------|----------------|--------------|--------------|----------------|--------------|--------------|----------------|--------|--------|-----|-------|-----|-----|-----|----------|
| Human<br>1A4   |              | 118          | 118          | 116            | 96           | 98           | 98             | 106          | 105          | 103            | 99     | 81     | 79  | 63    | 68  | 80  | 76  | 63       |
| Human<br>1A3   | 119          |              | 117          | 115            | 97           | 99           | 99             | 107          | 106          | 104            | 99     | 81     | 78  | 63    | 68  | 79  | 76  | 63       |
| Chimp<br>1A3   | 118          | 118          |              | 115            | 96           | 97           | 97             | 105          | 104          | 102            | 98     | 81     | 78  | 63    | 67  | 80  | 75  | 62       |
| Gorilla<br>1A3 | 117          | 117          | 116          |                | 95           | 97           | 97             | 105          | 104          | 103            | 98     | 80     | 80  | 63    | 67  | 80  | 76  | 61       |
| Human<br>1A2   | 104          | 104          | 103          | 102            |              | 110          | 112            | 106          | 107          | 105            | 100    | 81     | 79  | 67    | 70  | 79  | 74  | 61       |
| Chimp<br>1A2   | 106          | 106          | 105          | 104            | 114          |              | 112            | 106          | 109          | 105            | 100    | 82     | 78  | 67    | 71  | 79  | 74  | 60       |
| Gorilla<br>1A2 | 105          | 105          | 104          | 103            | 115          | 115          |                | 108          | 109          | 107            | 102    | 80     | 80  | 66    | 70  | 79  | 75  | 63       |
| Human<br>1A1   | 110          | 110          | 109          | 108            | 110          | 110          | 111            |              | 115          | 113            | 106    | 84     | 85  | 68    | 74  | 80  | 82  | 63       |
| Chimp<br>1A1   | 111          | 111          | 110          | 109            | 111          | 111          | 112            | 117          |              | 112            | 107    | 85     | 84  | 67    | 73  | 80  | 80  | 63       |
| Gorilla<br>1A1 | 109          | 109          | 108          | 107            | 111          | 111          | 112            | 115          | 116          |                | 104    | 83     | 84  | 67    | 73  | 79  | 81  | 62       |
| Macaca         | 108          | 108          | 107          | 106            | 107          | 107          | 108            | 112          | 113          | 112            |        | 82     | 85  | 68    | 74  | 78  | 80  | 61       |
| Rabbit         | 95           | 95           | 96           | 94             | 94           | 96           | 95             | 97           | 98           | 98             | 98     |        | 72  | 65    | 65  | 80  | 72  | 56       |
| Dog            | 100          | 100          | 99           | 100            | 100          | 100          | 101            | 105          | 104          | 104            | 103    | 91     |     | 68    | 71  | 79  | 81  | 54       |
| Mouse          | 85           | 85           | 85           | 84             | 86           | 87           | 86             | 87           | 86           | 86             | 87     | 86     | 89  |       | 99  | 60  | 64  | 44       |
| Rat            | 89           | 89           | 88           | 88             | 89           | 90           | 89             | 92           | 91           | 91             | 92     | 88     | 92  | 107   |     | 64  | 68  | 47       |
| Cow            | 98           | 98           | 99           | 98             | 100          | 100          | 101            | 101          | 102          | 102            | 101    | 93     | 101 | 81    | 86  |     | 80  | 54       |
| Pig            | 95           | 95           | 94           | 94             | 94           | 94           | 95             | 99           | 98           | 98             | 98     | 89     | 99  | 82    | 87  | 97  |     | 57       |
| Platypus       | 85           | 85           | 84           | 84             | 86           | 86           | 87             | 87           | 88           | 88             | 88     | 82     | 88  | 79    | 80  | 86  | 91  |          |
